# Supplementary material
Source: Royal Society of Chemistry journal article supplement (doi:10.1039/d6ew00298f)
Supplement: d6ew00298f1.pdf [file d6ew00298f1.pdf]

1        **Long-overlooked coumarins in swimming pool water and their**  
2        **contributions to the formation of disinfection byproducts**

3   **Meng Zou<sup>a</sup>, Jiajian Zhou<sup>a</sup>, Ziyi Zhou<sup>a</sup>, Yu Chen<sup>a</sup>, Lifeng Tan<sup>b</sup>, Yi Lu<sup>a</sup>, Ziwei Tan<sup>a</sup>,**  
4   **Wenfang Sun<sup>c</sup>, Mingcong Chen<sup>c</sup>, Mian Xu<sup>d</sup>, Fan Ke<sup>e</sup>, Miao Zhou<sup>a</sup>, Qian Wu<sup>a,f\*</sup>,**  
5   **Xiangping Liu<sup>c\*</sup>, Guang Huang<sup>a,f,g\*</sup>**

6   a. Center for Global Health, School of Public Health, Nanjing Medical University, Nanjing, Jiangsu  
7   211166, China

8   b. Changzhou Center for Disease Control and Prevention, Changzhou, Jiangsu 213022, China.

9   c. Nanjing Public Health Institute of Nanjing Medical University, Nanjing Municipal Key  
10   Laboratory for Public Health Laboratory Technology, Nanjing Municipal Center for Disease  
11   Control and Prevention, Jiangsu, Nanjing 210003, China

12   d. Department of Physical Education, Nanjing Medical University, Nanjing, Jiangsu, 210003, China

13   e. SCIEX Analytical Instrument Trading Co., Ltd, Shanghai 200335, China

14   f. Key Lab of Modern Toxicology of Ministry of Education, School of Public Health, Nanjing  
15   Medical University, 101 Longmian Avenue, Nanjing, Jiangsu 211166, China

16   g. Key Laboratory of Public Health Safety and Emergency Prevention and Control Technology of  
17   Higher Education Institutions in Jiangsu Province, School of Public Health, Nanjing Medical  
18   University, Nanjing, Jiangsu 211166, China

19   Corresponding author:

20   Qian Wu,   wuqian@njmu.edu.cn

21   Xiangping Liu,   Lxping89@126.com

22   Guang Huang,   guanghuang@njmu.edu.cn,   86-25-86868401

23

24

25 **Text S1: Materials.**

26 Chloroacetic acid (MCAA), dichloroacetic acid (DCAA), trichloroacetic acid  
27 (TCAA), bromoacetic acid (MBAA), dibromochloroacetic acid (DBCA),  
28 tribromoacetic acid (TBAA), dibromoacetic acid (DBAA), bromochloroacetic acid  
29 (BCAA), iodoacetic acid (IAA) were provided from Shanghai Macklin Co., Ltd  
30 (Shanghai, China). 1,2,3-trichloropropanone (1,2,3-TCP), trichloromethane (TCM),  
31 dibromochloromethane (DBCM), dichlorobromomethane (BDCM),  
32 trichloroacetaldehyde (TCA), tribromomethane (TBM), tribromoacetaldehyde (TBA),  
33 m-bromofluorobenzene (MBF), 7-hydroxy-4-methylcoumarin (7-OH-4-CH<sub>3</sub>-  
34 coumarin), 6-hydroxy-4-methylcoumarin (6-OH-4-CH<sub>3</sub>-coumarin), 7-  
35 hydroxycoumarin (7-OH-coumarin), 6,7-dihydroxycoumarin (6,7-di-OH-coumarin),  
36 3-aminocoumarin (3-NH<sub>2</sub>-coumarin), and coumarin were purchased from Shanghai  
37 BiDe Pharmaceutical Technology Co., Ltd. (Shanghai, China). Moreover, 5,7-  
38 dihydroxy-4-methylcoumarin (5,7-di-OH-4-CH<sub>3</sub>-coumarin) and 7-methoxy-4-  
39 methylcoumarin (7-OCH<sub>3</sub>-4-CH<sub>3</sub>-coumarin) were obtained from Shanghai Yien  
40 Chemical Technology Co., Ltd. (Shanghai, China). Humic acid and ascorbic acid were  
41 directly obtained from Shanghai Xianding Biological Technology. The solvents used  
42 in the experiments, including analytical-grade methanol and acetonitrile were obtained  
43 from Taicang Hu's Reagent Co., Ltd. (Shanghai, China), while LC/MS grade methanol  
44 and acetonitrile were procured from Tediai Company (Anhui, China). Sodium  
45 hypochlorite (analytical grade, available chlorine  $\geq 6\%$ ) was purchased from Tianjin  
46 Kemeier Chemical Reagent Co., Ltd. The free chlorine content in the solution was  
47 measured to be 72.5 mg/mL using a chlorine colorimeter (Thermo Fisher Scientific,  
48 AQUAfast AQ3170). Sodium hydrogen phosphate dodecahydrate and disodium  
49 hydrogen phosphate dihydrate were obtained from Guangdong Xilong Technology Co.,  
50 Ltd. (Guangdong, China). The deionized water used in the experiments was obtained  
51 using a Millipore Milli-Q system (Millipore-Sigma Inc., Milford, MA, USA). Methyl  
52 tert-butyl ether (MTBE), Na<sub>2</sub>SO<sub>4</sub>, NaHCO<sub>3</sub> were obtained from Sinopharm Chemical  
53 Reagent Co., Ltd. NanoMicro HLB solid-phase extraction cartridges (6 mL, 500 mg  
54 per cartridge) were acquired from NanoChrom Technologies (Suzhou) Co., Ltd. The

55 sand was purchased from the water treatment plant.

#### 56 **Text S2: High-Resolution Mass Spectrometry Analysis**

57 The UltiMate 3000 liquid chromatography-tandem Q Exactive hybrid quadrupole-  
58 orbitrap mass spectrometer (Thermo Fisher Scientific, San Jose, CA, USA) equipped  
59 with a heated electrospray ionization (H-ESI II) source was used to acquire the accurate  
60 full scan mass spectra and the MS/MS spectra of the analytes. The separation was  
61 carried out by a Luna C18 column (100 mm × 2.0 mm, 3 μm, Phenomenex) at a flow  
62 rate of 0.3 mL/min with the column temperature at 40 °C. The mobile phase consisted  
63 of ultrapure water containing 0.1% FA (solvent A), and acetonitrile (ACN) with 0.1%  
64 FA (solvent B). A gradient elution program was performed by increasing solvent B  
65 from 20% to 90% within 0-5 minutes, held for 2.5 minutes, then returning to 20%  
66 solvent B in 0.1 minutes and held for 2.4 minutes for column equilibration. The auto-  
67 sampler was set at 8 °C, and the resolution of full mass scan (m/z 50-600) was set to  
68 60,000. Data dependent acquisition (ddMS<sup>2</sup>) was performed under both positive and  
69 negative mode with a resolution of 15000. HESI parameters were set as follows: static  
70 spray voltage, positive voltage at 3.5 kV, negative voltage at 2.5 kV, sheath gas flow  
71 rate at 50, auxiliary gas flow rate at 10, sweep gas flow rate at 1, ion transfer tube  
72 temperature at 325 °C, and vaporizer temperature at 350 °C. Data analysis was  
73 conducted using Xcalibur software (version 2.2).

#### 74 **Text S3: HPLC-MS/MS (MRM) Method**

75 Quantification of coumarins was performed on a Triple Quad 7500+ (SCIEX,  
76 USA) operated in MRM mode. The mobile phase and gradient program were identical  
77 to those described in **Text S2**. The optimized mass spectrometer parameters included a  
78 spray voltage of 1500 V for positive mode, and 2000 V for negative mode; curtain gas,  
79 40 psi; gas 1, 50; gas 2, 50 psi; source temperature, 500 °C, and an accumulation time  
80 of 430 ms for each ion pair. The MRM transition ions, along with optimized values for  
81 DP, collision energy (CE), and cell exit potential (CXP), are detailed in Table S1. Data  
82 analysis was performed using the analysis software SCIEX OS for the Sciex QTRAP  
83 7500+. The MRM mode detection conditions for coumarins are shown in **Table S1**.

#### 84 **Text S4: GC-MS/MS (MRM) Method**

85 THMs, HALs, and HAAs in actual water samples were determined using GC-MS  
86 (Thermo Fisher Scientific, TSQ8000) equipped with a DB-5 capillary column (30 m ×  
87 0.25 mm × 0.25µm). The parameters for detection of THMs, and HALs were as follows:  
88 injection port temperature, 200 °C; ion source temperature, 200 °C; interface  
89 temperature, 230 °C; split ratio, 5:1; carrier gas, ammonia; scan mode, MRM; solvent  
90 delay, 1 min. The temperature programming started at 35 °C, held for 3 minutes, ramped  
91 to 60 °C at 15 °C/min and held for 5 min, then ramped to 150 °C at 30 °C/min and held  
92 for 3 min, and finally ramped to 220°C at 50°C/min and held for 3 min.

93 The parameters for detection of haloacetic acid methyl ester included injection port  
94 temperature, 230 °C; ion source temperature, 250 °C; interface temperature, 240 °C;  
95 splitless; carrier gas, helium; scan mode: MRM; solvent delay, 1 min. The temperature  
96 programming started at 35 °C, held for 5 min, ramped to 85°C at 10°C/min and held for  
97 5 minutes, then ramped to 250°C at 30°C/min and held for 5 minutes. The MRM mode  
98 detection conditions for volatile DBPs are shown in **Table S2**.

99

100

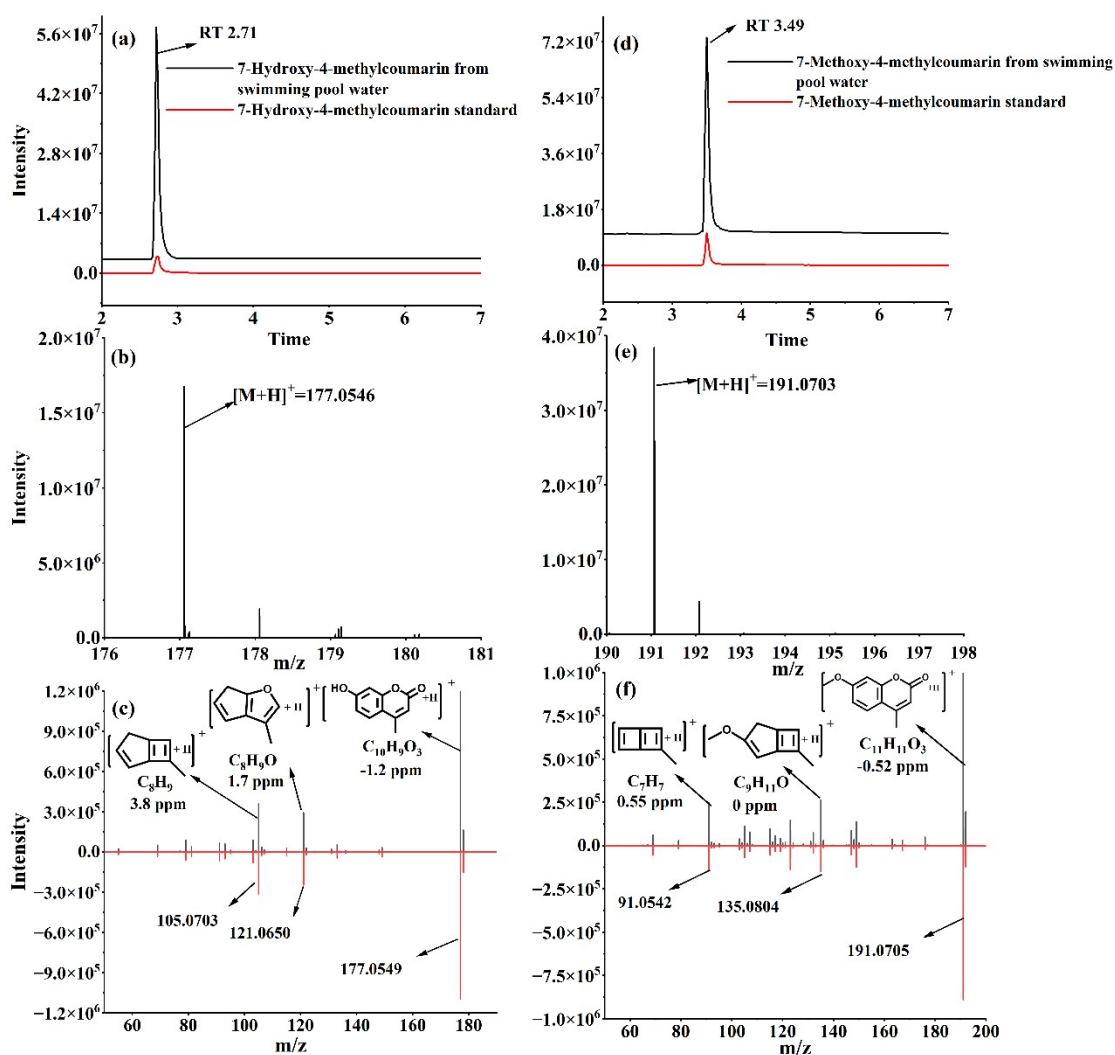

102

103 **Figure S1.** Mass spectra of commonly detected 7-OH-4-CH<sub>3</sub>-coumarin and 7-OCH<sub>3</sub>-  
 104 4-CH<sub>3</sub>-coumarin in two different sources of swimming pool water: (a) extracted ion  
 105 chromatogram (EIC), (b) full mass scan, and (c) MS<sup>2</sup> spectrum of 7-OH-4-CH<sub>3</sub>-  
 106 coumarin in swimming pool water; (d) EIC, (e) full mass scan, and (f) MS<sup>2</sup> spectrum  
 107 of 7-OCH<sub>3</sub>-4-CH<sub>3</sub>-coumarin in swimming pool water.

108

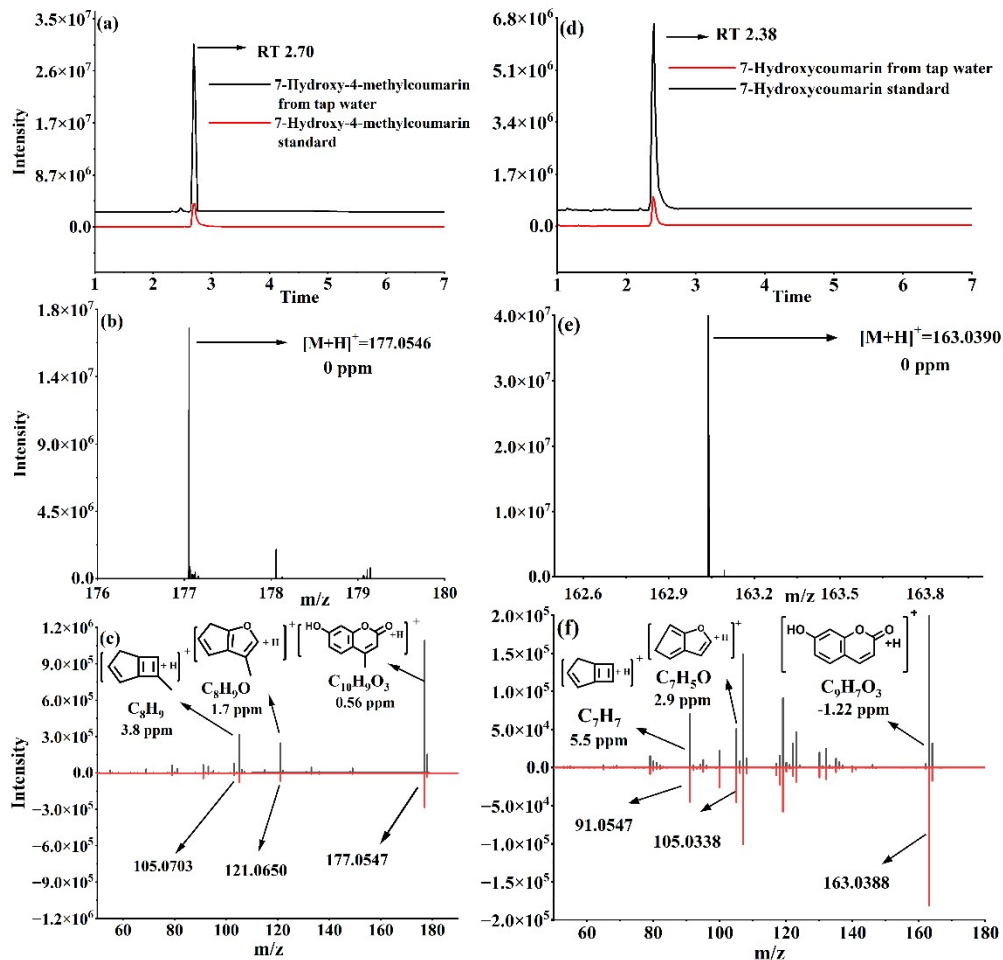

109

110 **Figure S2.** Mass spectra of commonly detected 7-OH-4-CH<sub>3</sub>-coumarin and 7-OH-  
 111 coumarin in two different sources of tap water: (a) extracted ion chromatogram (EIC),  
 112 (b) full mass scan, and (c) MS<sup>2</sup> spectrum of 7-OH-4-CH<sub>3</sub>-coumarin in tap water; (d)  
 113 EIC, (e) full mass scan, and (f) MS<sup>2</sup> spectrum of 7-OCH<sub>3</sub>-4-CH<sub>3</sub>-coumarin in tap water.

114

115

116

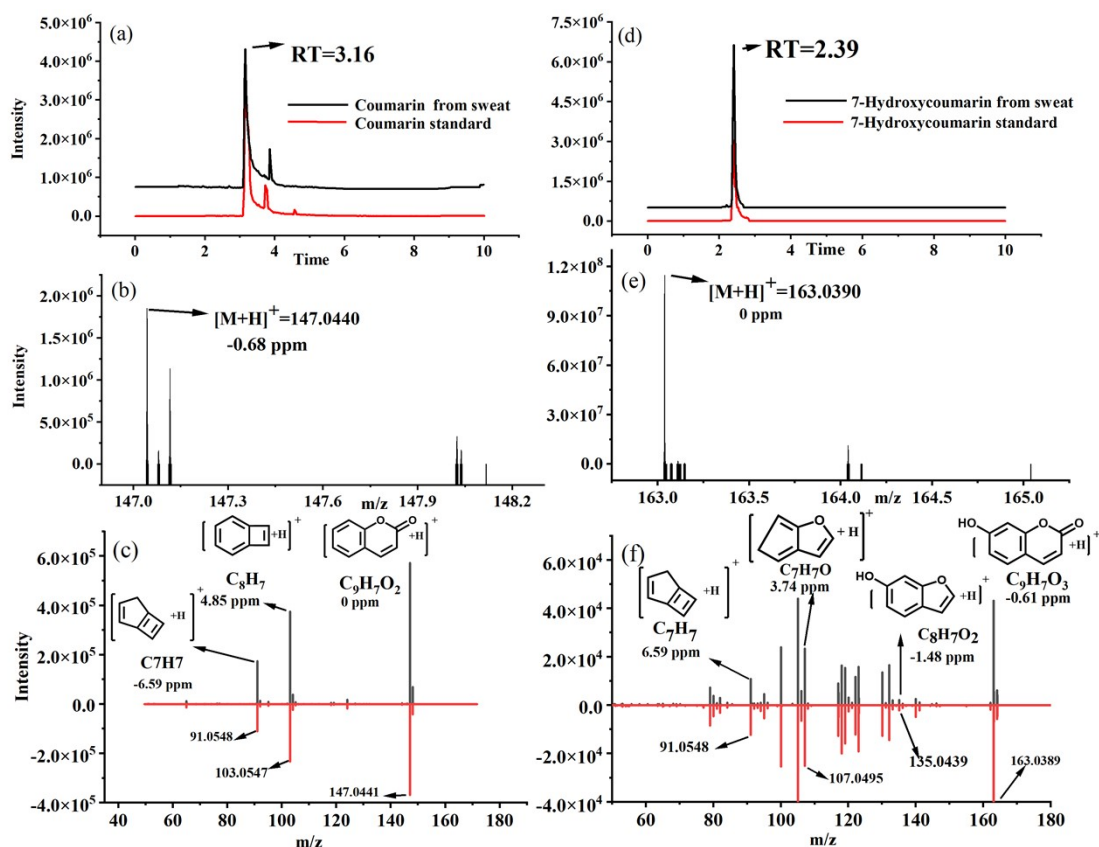

118

119

120 **Figure S3.** Mass spectra of commonly detected coumarin and 7-OH-coumarin in two  
 121 different sources of sweat samples: (a) extracted ion chromatogram (EIC), (b) full mass  
 122 scan, and (c)  $MS^2$  spectrum of coumarin in sweat samples; (d) EIC, (e) full mass scan,  
 123 and (f)  $MS^2$  spectrum of 7-OH-coumarin in sweat samples.

124

125

126

127

128

129

130

131

132

133

134

135

136

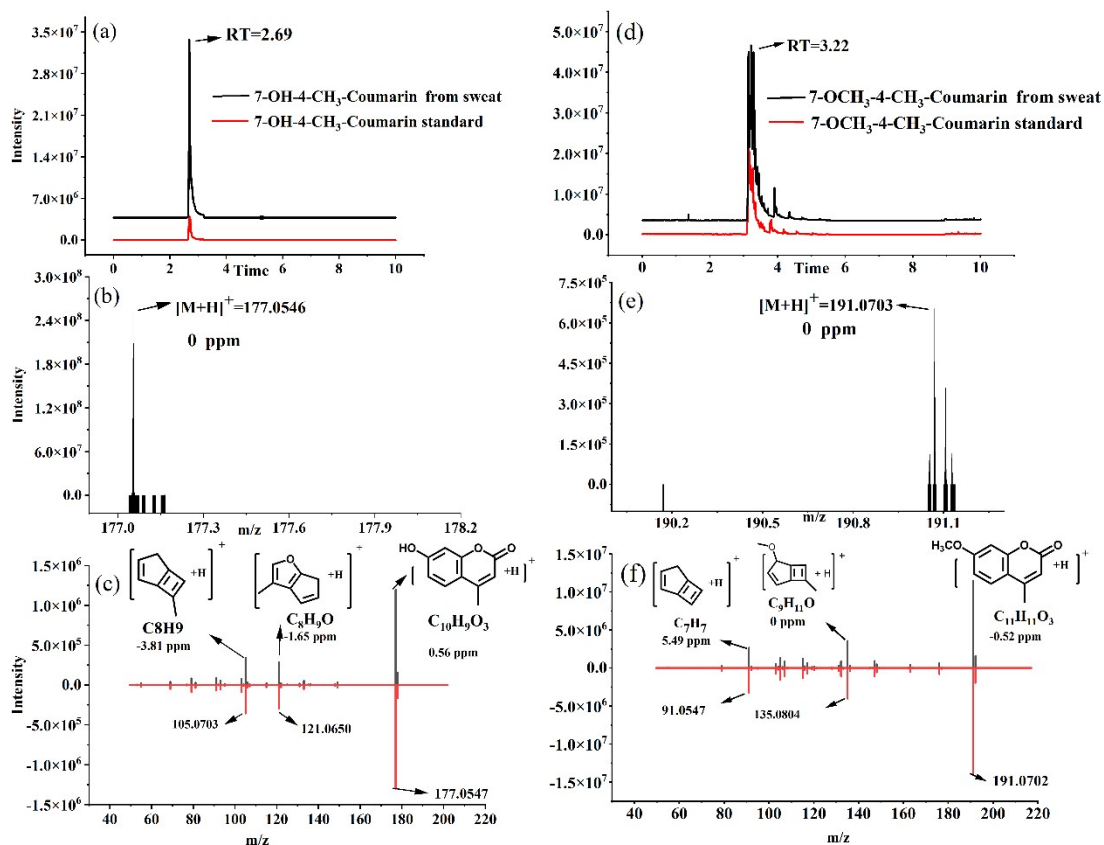

137

138 **Figure S4.** Mass spectra of commonly detected coumarin and 7-OH-4-CH<sub>3</sub>-coumarin  
 139 and 7-OCH<sub>3</sub>-4-CH<sub>3</sub>-coumarin in two different sources of sweat samples: (a) extracted  
 140 ion chromatogram (EIC), (b) full mass scan, and (c) MS<sup>2</sup> spectra of 7-OH-4-CH<sub>3</sub>-  
 141 coumarin in sweat samples; (d) EIC, (e) full mass scan, and (f) MS<sup>2</sup> spectrum of 7-  
 142 OCH<sub>3</sub>-4-CH<sub>3</sub>-coumarin in sweat samples.

143

144

145

146

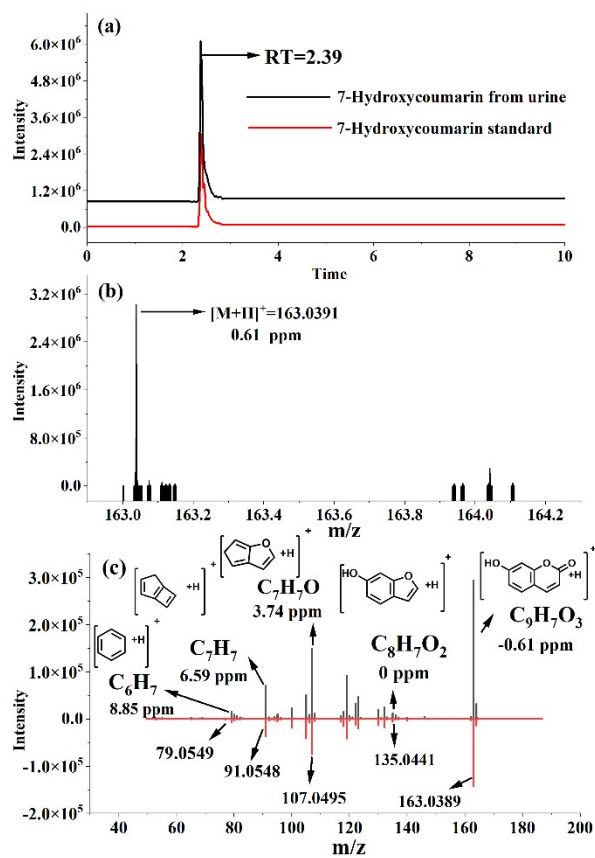

147

148 **Figure S5.** Mass spectra of commonly detected 7-OH-coumarin in three different  
 149 sources of urine samples: (a) extracted ion chromatogram (EIC), (b) full mass scan, and  
 150 (c)  $MS^2$  spectrum of 7-OH-coumarin in urine samples.

151

152

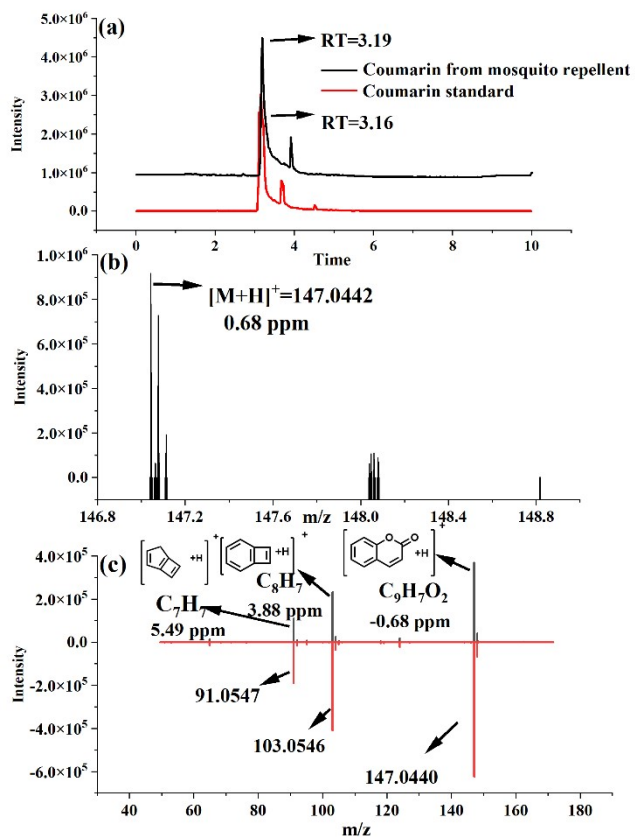

153

154 **Figure S6.** Mass spectra of coumarin in mosquito repellent: (a) extracted ion  
 155 chromatogram (EIC), (b) full mass scan, and (c) MS<sup>2</sup> spectrum of the detected  
 156 coumarin.

157

158

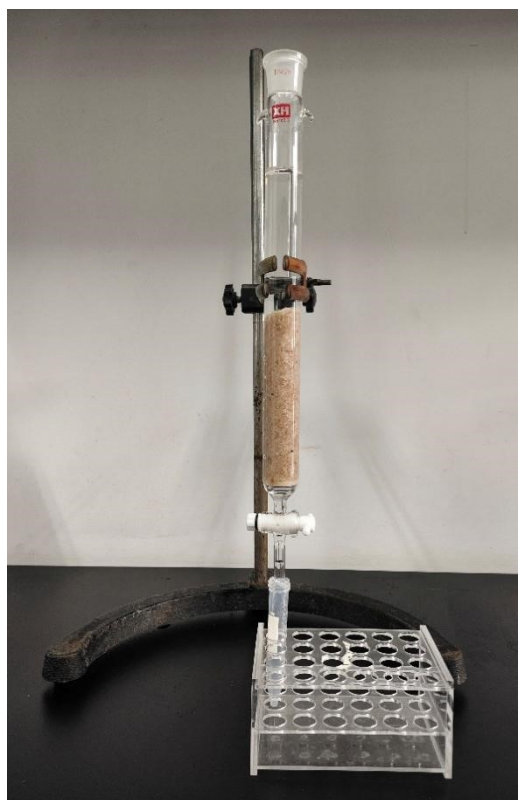

159

160 **Figure S7.** Removal of coumarins by sand filtration.

161

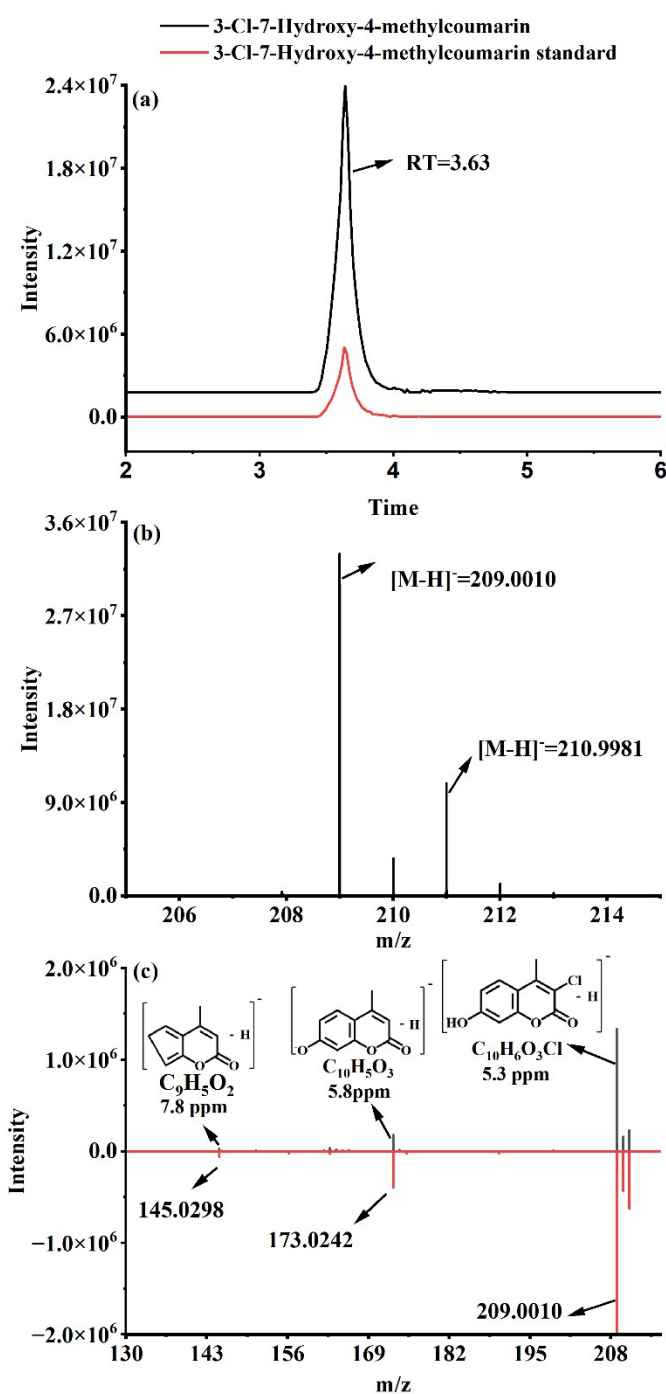

162  
 163 **Figure S8.** Mass spectra of 3-Cl-7-OH-4-CH<sub>3</sub>-coumarin in chlorination (2 mg/L as free  
 164 chlorine) of tap water spiked with 7-OH-4-CH<sub>3</sub>-coumarin: (a) extracted ion  
 165 chromatogram (EIC), (b) full mass scan, and (c) MS<sup>2</sup> spectrum of the detected 3-Cl-7-  
 166 OH-4-CH<sub>3</sub>-coumarin.

167  
 168

169

170

171 **Table S1.** pH of swimming pool (SP) water, residual free chlorine in SP water, and  
172 dissolved organic carbon (DOC) in tap water (near pool) and in SP water.

|                                 | pH of SP<br>water | Residual free chlorine<br>in SP water (mg/L) | DOC in tap water<br>(near pool) (mg/L) | DOC in SP<br>water (mg/L) |
|---------------------------------|-------------------|----------------------------------------------|----------------------------------------|---------------------------|
| Swimming pool 1<br>in Nanjing   | 8.3               | 1.85                                         | 0.60                                   | 1.90                      |
| Swimming pool 2<br>in Changzhou | 8.5               | 1.58                                         | 0.78                                   | 2.00                      |

173

174

175

176

177 **Table S2.** MRM parameters for LC-MS/MS analysis of coumarins.

178

| Name                                            | Q1    | Q3    | EP(V) | CE(V) | CXP(V) |
|-------------------------------------------------|-------|-------|-------|-------|--------|
| Coumarin                                        | 146.9 | 102.9 | 10    | 24    | 15     |
|                                                 |       | 90.9  | 10    | 32    | 15     |
|                                                 |       | 76.9  | 10    | 33    | 15     |
| 5,7-Di-OH-4-CH <sub>3</sub> -coumarin           | 193.2 | 91.1  | 10    | 41    | 15     |
|                                                 |       | 119.1 | 10    | 17    | 15     |
|                                                 |       | 137.1 | 10    | 32    | 15     |
| 7-OH-4-CH <sub>3</sub> -coumarin                | 177.0 | 121.0 | 10    | 29    | 15     |
|                                                 |       | 103.0 | 10    | 35    | 15     |
|                                                 |       | 77.0  | 10    | 50    | 15     |
| 7-OH-coumarin                                   | 163.1 | 107.1 | 10    | 29    | 15     |
|                                                 |       | 77.1  | 10    | 43    | 15     |
|                                                 |       | 91.1  | 10    | 47    | 15     |
| 6,7-Di-OH-coumarin                              | 179.0 | 123.1 | 10    | 30    | 15     |
|                                                 |       | 133.0 | 10    | 28    | 15     |
|                                                 |       | 77.1  | 10    | 44    | 15     |
| 3-NH <sub>2</sub> -coumarin                     | 162.1 | 106.1 | 10    | 24    | 15     |
|                                                 |       | 79.1  | 10    | 31    | 15     |
|                                                 |       | 134.1 | 10    | 21    | 15     |
| 7-OCH <sub>3</sub> -4-CH <sub>3</sub> -coumarin | 191.0 | 91.0  | 10    | 57    | 15     |
|                                                 |       | 103.1 | 10    | 42    | 15     |
|                                                 |       | 148.2 | 10    | 40    | 15     |
| 7,8-Di-OH--6-CH <sub>3</sub> -coumarin          | 209.0 | 194.0 | 10    | 32    | 15     |
|                                                 |       | 149.0 | 10    | 29    | 15     |
| 7-Cl-7-OH-4-CH <sub>3</sub> -coumarin           | 209.0 | 173.0 | -10   | -24   | -15    |
|                                                 |       | 35.0  | -10   | -33   | -15    |

179

180

181 **Table S3.** MRM parameters for GC-MS/MS analysis of HAAs, THMs and HALs.

| Name | RT(min) | Mass  | Product Mass | CE(eV) |
|------|---------|-------|--------------|--------|
| MCAA | 5.57    | 108.0 | 76           | 8      |
| MBAA | 8.38    | 120.9 | 93           | 8      |
| MBAA | 8.38    | 123.0 | 95           | 10     |
| DCAA | 8.70    | 85.0  | 48           | 30     |
| TCAA | 10.53   | 116.9 | 82           | 26     |
| IAA  | 10.59   | 140.9 | 63           | 12     |
| BCAA | 10.65   | 128.9 | 127.1        | 38     |
| DBAA | 12.99   | 172.9 | 94           | 38     |
| TBAA | 17.77   | 250.8 | 171.9        | 36     |
| TCM  | 2.89    | 82.9  | 47           | 24     |
| BDCM | 4.17    | 83.0  | 47           | 24     |
| TCA  | 4.20    | 82.0  | 47           | 26     |
| DBCM | 5.87    | 128.9 | 48           | 34     |
| TBM  | 8.72    | 170.8 | 91.8         | 38     |
| TBA  | 11.84   | 172.9 | 91.1         | 28     |

182

183

184

185

186

187

188

189

190

191

192

193

194

195

196

197

198

199

200

201

202

203

204

205 **Table S4.** Recoveries, instrument limits of detection (LODs), instrument limits of  
 206 quantification (LOQs), and method detection limits (MDLs) of HAAs, THMs, HALs  
 207 and coumarins.

208

| Compounds                                       | LOD<br>( $\mu\text{g/L}$ ) | LOQ<br>( $\mu\text{g/L}$ ) | MDL<br>( $\text{ng/L}$ ) | Recovery<br>(%) |
|-------------------------------------------------|----------------------------|----------------------------|--------------------------|-----------------|
| MCAA                                            | 0.500                      | 1.00                       | 62.8                     | 91.5            |
| DCAA                                            | 5.00                       | 10.0                       | 73.0                     | 69.9            |
| TCAA                                            | 1.00                       | 5.00                       | 630                      | 65.9            |
| IAA                                             | 1.00                       | 5.00                       | $1.16 \times 10^3$       | 56.2            |
| TCM                                             | 6.00                       | 10.0                       | $4.23 \times 10^3$       | 64.9            |
| BDCM                                            | 10.0                       | 50.0                       | 650                      | 62.9            |
| TCA                                             | 10.0                       | 25.0                       | $2.17 \times 10^3$       | 75.7            |
| DBCM                                            | 1.00                       | 5.00                       | $9.33 \times 10^3$       | 82.2            |
| TBM                                             | 0.500                      | 1.00                       | 420                      | 71.5            |
| TBA                                             | 5.00                       | 10.0                       | $1.23 \times 10^3$       | 76.4            |
| Coumarin                                        | 0.0100                     | 0.0500                     | 0.120                    | 80.0            |
| 6-OH-4-CH <sub>3</sub> -coumarin                | 0.0500                     | 0.100                      | 0.0800                   | 86.9            |
| 7-OCH <sub>3</sub> -4-CH <sub>3</sub> -coumarin | 0.0500                     | 0.100                      | 0.0500                   | 70.8            |
| 7-OH-4-CH <sub>3</sub> -coumarin                | 0.0500                     | 0.100                      | 0.00200                  | 83.0            |
| 7-OH-coumarin                                   | 0.0500                     | 0.100                      | 0.0100                   | 89.3            |
| 6,7-Di-OH-coumarin                              | 0.0500                     | 0.100                      | 0.5400                   | 75.3            |
| 3-NH <sub>2</sub> -coumarin                     | 0.0500                     | 0.100                      | 0.00200                  | 71.0            |
| 5,7-Di-OH-4-CH <sub>3</sub> -coumarin           | 0.0500                     | 0.100                      | 0.0900                   | 69.0            |
| 7-Cl-6-OH-4-CH <sub>3</sub> -coumarin           | 0.0500                     | 0.100                      | 0.003                    | 26.15           |

209
